# Supplementary material for: The Effect of Lactobacillus casei 32G on the Mouse Cecum Microbiota and Innate Immune Response Is Dose and Time Dependent
Source: PLOS journal article supplement (doi:10.1371/journal.pone.0145784), 2015-12-29
Supplement: S1 (10.1371/journal.pone.0145784.s001) [file journal.pone.0145784.s001]

A)

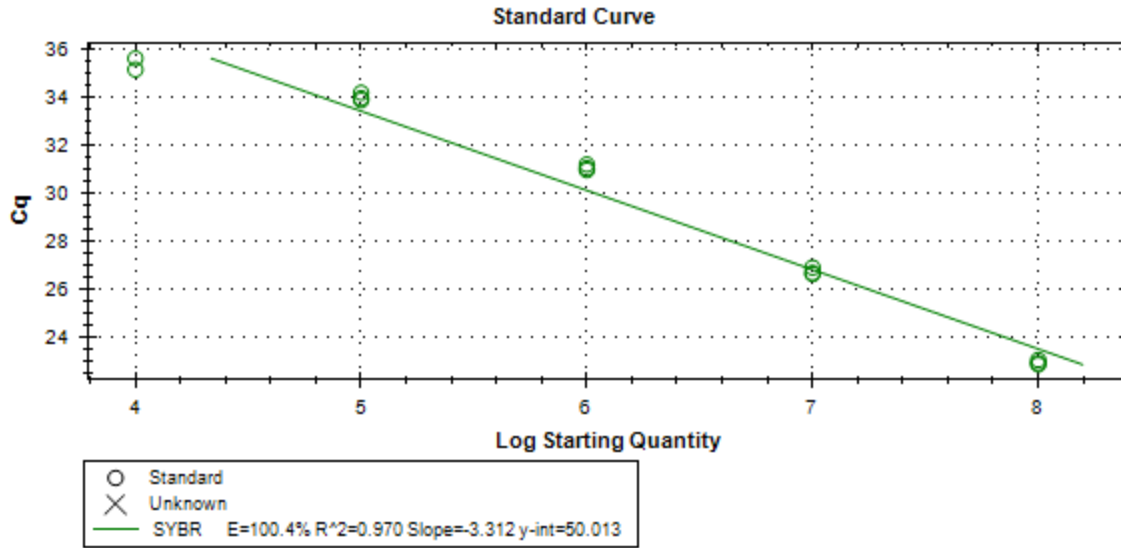

B)

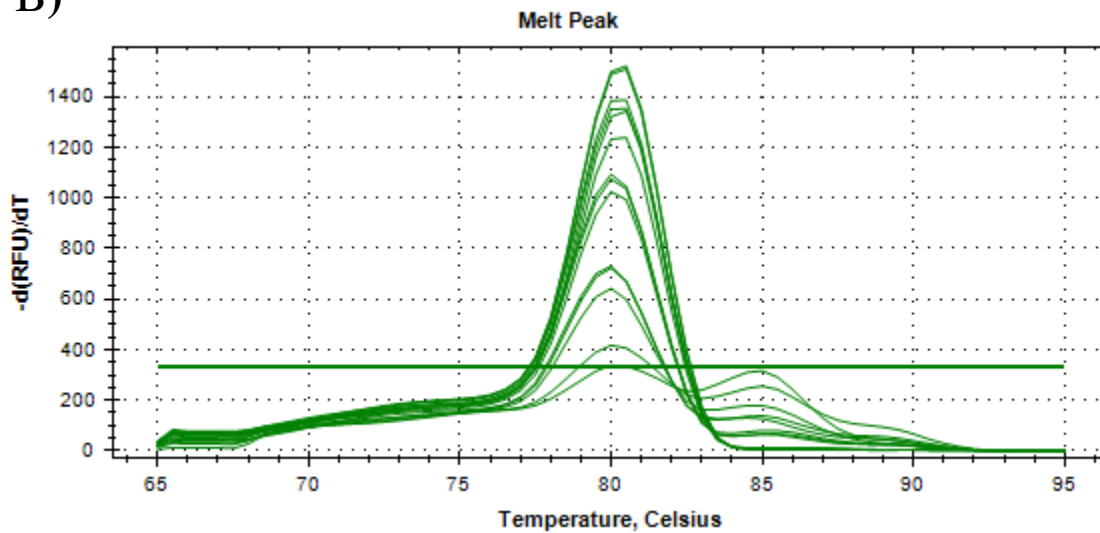

**S1 Fig. qPCR standard curve for quantification of *L. casei* 32G in mouse cecum.** The standard curves were generated by amplification of DNA isolated from cecum content spiked with  $10^8$ ,  $10^7$ ,  $10^6$ ,  $10^5$ , or  $10^4$  CFU/ml of *L. casei* 32G culture, (n:3 for each concentration). A) Standard curve. B) Melting curves.
