# Supplementary material for: The Effect of Lactobacillus casei 32G on the Mouse Cecum Microbiota and Innate Immune Response Is Dose and Time Dependent
Source: PLOS journal article supplement (doi:10.1371/journal.pone.0145784), 2015-12-29
Supplement: S6 (10.1371/journal.pone.0145784.s006) [file journal.pone.0145784.s006]

**S1 Table.** Expression profile of *Lactobacillus casei* 32G gene at 3.5h time point.

| Mouse Groups | MC properties +/- |
|--------------|-------------------|
| Control      | –                 |
| Control      | –                 |
| Control      | –                 |
| Control      | –                 |
| Low          | –                 |
| Low          | –                 |
| Low          | –                 |
| Low          | –                 |
| Medium       | –                 |
| Medium       | –                 |
| Medium       | +                 |
| Medium       | +                 |
| High         | +                 |
| High         | +                 |
| High         | +                 |
| High         | +                 |

–, expression not detected; no specific melting curve (MC); +, expression detected
