# Supplementary material for: The Effect of Lactobacillus casei 32G on the Mouse Cecum Microbiota and Innate Immune Response Is Dose and Time Dependent
Source: PLOS journal article supplement (doi:10.1371/journal.pone.0145784), 2015-12-29
Supplement: S7 (10.1371/journal.pone.0145784.s007) [file journal.pone.0145784.s007]

**S2 Table.** Bacterial genera detected<sup>a</sup> in cecum content of mice administered saline (control) or *Lactobacillus casei* 32G once per day by oral gavage sorted based on dose.

| Taxon                         | Percentage (mean ± SE) <sup>bc</sup> |                  |                    |                  |             |                   |                   |                  |
|-------------------------------|--------------------------------------|------------------|--------------------|------------------|-------------|-------------------|-------------------|------------------|
|                               | Control                              |                  |                    |                  | Low         |                   |                   |                  |
|                               | 0.5h                                 | 3.5h             | 12h                | 24h              | 0.5h        | 3.5h              | 12h               | 24h              |
| <i>S24-7 IS</i>               | 66.2 ± 15.2                          | 75.0 ± 15.8      | <b>84.6 ± 10.3</b> | 53.6 ± 22.0      | 61.4 ± 27.7 | 81.3 ± 17.5       | <b>86.2 ± 5.9</b> | 70.8 ± 20.7      |
| <i>Lachnospiraceae IS</i>     | 15.9 ± 9.9                           | 8.9 ± 7.2        | <b>7.1 ± 6.0</b>   | 28.8 ± 19.7      | 26.1 ± 25.0 | <b>8.0 ± 10.2</b> | <b>3.3 ± 2.5</b>  | 12.3 ± 11.3      |
| <i>Oscillospira</i>           | 10.0 ± 4.7                           | <b>3.3 ± 3.0</b> | <b>2.4 ± 2.8</b>   | 7.2 ± 3.3        | 3.8 ± 1.6   | 2.7 ± 3.6         | <b>1.0 ± 0.6</b>  | 7.1 ± 6.2        |
| <i>Ruminococcaceae Other</i>  | 2.1 ± 1.2                            | <b>0.6 ± 0.3</b> | 2.0 ± 1.4          | 2.3 ± 1.4        | 3.2 ± 2.3   | <b>1.4 ± 0.6</b>  | 3.3 ± 1.9         | 3.2 ± 1.9        |
| <i>Ruminococcus</i>           | 1.3 ± 0.6                            | <b>0.7 ± 0.4</b> | 1.0 ± 0.5          | 0.8 ± 0.3        | 1.1 ± 0.7   | <b>0.5 ± 0.4</b>  | 1.9 ± 1.4         | 1.0 ± 0.3        |
| <i>Clostridia Other</i>       | 1.2 ± 0.8                            | <b>0.3 ± 0.1</b> | <b>0.5 ± 0.5</b>   | 0.9 ± 0.3        | 1.0 ± 0.6   | 0.6 ± 0.6         | 0.6 ± 0.3         | 0.8 ± 1.2        |
| <i>Lactobacillus</i>          | 0.9 ± 1.6                            | <b>6.8 ± 7.7</b> | 0.4 ± 0.5          | 3.7 ± 4.3        | 0.5 ± 0.9   | 3.6 ± 6.9         | 0.6 ± 0.9         | 1.1 ± 1.0        |
| <i>Lachnospiraceae Other</i>  | 0.9 ± 0.4                            | <b>0.3 ± 0.2</b> | <b>0.4 ± 0.5</b>   | 0.8 ± 0.4        | 0.9 ± 0.5   | <b>0.3 ± 0.4</b>  | 0.7 ± 0.8         | 1.1 ± 1.5        |
| <i>Clostridiales Other</i>    | 0.6 ± 0.3                            | <b>0.1 ± 0.1</b> | <b>0.3 ± 0.3</b>   | 0.6 ± 0.3        | 0.6 ± 0.4   | <b>0.3 ± 0.3</b>  | <b>0.2 ± 0.1</b>  | 0.5 ± 0.3        |
| <i>Ruminococcaceae IS</i>     | 0.2 ± 0.1                            | 0.3 ± 0.2        | 0.2 ± 0.1          | 0.2 ± 0.1        | 0.3 ± 0.4   | 0.2 ± 0.3         | 0.6 ± 0.7         | 0.4 ± 0.2        |
| <i>Firmicutes Other</i>       | 0.2 ± 0.1                            | 0.2 ± 0.1        | 0.2 ± 0.2          | 0.2 ± 0.1        | 0.1 ± 0.2   | 0.2 ± 0.2         | 0.2 ± 0.1         | <b>0.4 ± 0.3</b> |
| <i>Bacteria Other</i>         | 0.2 ± 0.0                            | 0.2 ± 0.1        | 0.2 ± 0.1          | <b>0.2 ± 0.1</b> | 0.1 ± 0.1   | 0.2 ± 0.1         | 0.1 ± 0.0         | <b>0.2 ± 0.1</b> |
| <i>Erysipelotrichaceae IS</i> | 0.1 ± 0.1                            | <b>0.0 ± 0.0</b> | <b>0.1 ± 0.1</b>   | <b>0.0 ± 0.0</b> | 0.2 ± 0.2   | 0.1 ± 0.0         | 0.1 ± 0.1         | 0.1 ± 0.1        |
| <i>Turicibacter</i>           | 0.0 ± 0.1                            | <b>2.7 ± 2.6</b> | <b>0.4 ± 0.5</b>   | 0.1 ± 0.1        | 0.1 ± 0.2   | 0.2 ± 0.2         | <b>0.8 ± 0.9</b>  | <b>0.3 ± 0.3</b> |
| <i>Coprobacillaceae IS</i>    | 0.0 ± 0.0                            | 0.0 ± 0.0        | 0.0 ± 0.0          | 0.0 ± 0.0        | 0.0 ± 0.0   | <b>0.1 ± 0.1</b>  | <b>0.0 ± 0.0</b>  | <b>0.2 ± 0.2</b> |
| <i>Adlercreutzia</i>          | BQL                                  | 0.2 ± 0.5        | 0.1 ± 0.2          | 0.1 ± 0.0        | 0.1 ± 0.1   | 0.1 ± 0.2         | 0.1 ± 0.2         | 0.2 ± 0.3        |
| <i>Coriobacteriales IS</i>    | BQL                                  | 0.0 ± 0.0        | BQL                | 0.0 ± 0.0        | BQL         | BQL               | BQL               | 0.0 ± 0.0        |

<sup>a</sup>Only genera that were present at ≥1% in a sample are included in this table.

<sup>b</sup>The detection limit was 0.00003 and this value was used to calculate the p-value.

<sup>c</sup>Genera that differ from 0.5 h time point within each group are shown in bold (p≤0.05).

IS: Incertae Sedis.

BQL: Below quantifiable limit.

Table S1. (Continued)

| Taxon                         | Percentage (mean $\pm$ SE) <sup>bc</sup> |                              |                             |                               |                 |                             |                             |                             |
|-------------------------------|------------------------------------------|------------------------------|-----------------------------|-------------------------------|-----------------|-----------------------------|-----------------------------|-----------------------------|
|                               | Medium                                   |                              |                             |                               | High            |                             |                             |                             |
|                               | 0.5h                                     | 3.5h                         | 12h                         | 24h                           | 0.5h            | 3.5h                        | 12h                         | 24h                         |
| <i>S24-7 IS</i>               | 70.4 $\pm$ 13.0                          | 65.9 $\pm$ 5.9               | 78.8 $\pm$ 20.3             | 52.9 $\pm$ 31.2               | 64.3 $\pm$ 25.3 | 69.7 $\pm$ 15.6             | 74.1 $\pm$ 14.0             | 60.9 $\pm$ 18.1             |
| <i>Lachnospiraceae IS</i>     | 13.8 $\pm$ 9.6                           | 13.9 $\pm$ 8.3               | 12.2 $\pm$ 14.6             | 10.7 $\pm$ 12.2               | 13.2 $\pm$ 8.5  | <b>2.7</b> $\pm$ <b>1.6</b> | 8.8 $\pm$ 8.4               | 10.2 $\pm$ 6.7              |
| <i>Oscillospira</i>           | 5.9 $\pm$ 3.9                            | <b>2.0</b> $\pm$ <b>1.3</b>  | <b>2.1</b> $\pm$ <b>2.7</b> | 4.9 $\pm$ 4.9                 | 4.3 $\pm$ 4.1   | <b>0.8</b> $\pm$ <b>0.6</b> | 1.9 $\pm$ 1.6               | 4.2 $\pm$ 3.1               |
| <i>Ruminococcaceae Other</i>  | 1.2 $\pm$ 0.8                            | <b>0.5</b> $\pm$ <b>0.2</b>  | 2.0 $\pm$ 2.1               | 2.6 $\pm$ 2.5                 | 2.4 $\pm$ 1.9   | 1.5 $\pm$ 1.0               | <b>8.3</b> $\pm$ <b>4.1</b> | 2.2 $\pm$ 0.9               |
| <i>Ruminococcus</i>           | 0.4 $\pm$ 0.2                            | <b>0.2</b> $\pm$ <b>0.1</b>  | 0.7 $\pm$ 0.8               | 0.6 $\pm$ 0.5                 | 1.2 $\pm$ 1.4   | 0.7 $\pm$ 0.8               | 1.2 $\pm$ 0.7               | 1.4 $\pm$ 1.2               |
| <i>Clostridia Other</i>       | 0.4 $\pm$ 0.4                            | 0.2 $\pm$ 0.1                | 0.3 $\pm$ 0.2               | 0.7 $\pm$ 0.7                 | 0.7 $\pm$ 0.7   | <b>0.2</b> $\pm$ <b>0.1</b> | 0.6 $\pm$ 0.5               | 0.8 $\pm$ 0.6               |
| <i>Lactobacillus</i>          | 5.0 $\pm$ 4.6                            | <b>15.0</b> $\pm$ <b>9.6</b> | <b>0.6</b> $\pm$ <b>0.4</b> | <b>24.8</b> $\pm$ <b>17.3</b> | 11.0 $\pm$ 16.4 | 22.2 $\pm$ 14.6             | 1.9 $\pm$ 2.7               | 16.9 $\pm$ 19.5             |
| <i>Lachnospiraceae Other</i>  | 0.4 $\pm$ 0.2                            | <b>0.2</b> $\pm$ <b>0.1</b>  | 0.3 $\pm$ 0.2               | 0.5 $\pm$ 0.5                 | 0.7 $\pm$ 0.6   | <b>0.2</b> $\pm$ <b>0.1</b> | 0.6 $\pm$ 0.5               | 0.8 $\pm$ 0.4               |
| <i>Clostridiales Other</i>    | 0.5 $\pm$ 0.4                            | <b>0.2</b> $\pm$ <b>0.1</b>  | 0.3 $\pm$ 0.2               | 0.6 $\pm$ 0.8                 | 0.4 $\pm$ 0.4   | <b>0.1</b> $\pm$ <b>0.1</b> | 0.6 $\pm$ 0.5               | 0.4 $\pm$ 0.2               |
| <i>Ruminococcaceae IS</i>     | 0.9 $\pm$ 0.6                            | 0.6 $\pm$ 0.3                | 1.0 $\pm$ 0.6               | <b>0.4</b> $\pm$ <b>0.3</b>   | 0.7 $\pm$ 0.9   | 0.8 $\pm$ 0.4               | 0.8 $\pm$ 0.5               | 0.5 $\pm$ 0.2               |
| <i>Firmicutes Other</i>       | 0.2 $\pm$ 0.1                            | 0.2 $\pm$ 0.1                | 0.2 $\pm$ 0.1               | <b>0.4</b> $\pm$ <b>0.2</b>   | 0.2 $\pm$ 0.2   | 0.2 $\pm$ 0.1               | 0.1 $\pm$ 0.1               | 0.4 $\pm$ 0.2               |
| <i>Bacteria Other</i>         | 0.3 $\pm$ 0.1                            | 0.4 $\pm$ 0.2                | <b>0.2</b> $\pm$ <b>0.1</b> | 0.3 $\pm$ 0.1                 | 0.2 $\pm$ 0.1   | 0.3 $\pm$ 0.1               | 0.4 $\pm$ 0.2               | <b>0.5</b> $\pm$ <b>0.1</b> |
| <i>Erysipelotrichaceae IS</i> | 0.1 $\pm$ 0.1                            | 0.1 $\pm$ 0.1                | 0.2 $\pm$ 0.2               | 0.1 $\pm$ 0.0                 | 0.0 $\pm$ 0.0   | 0.0 $\pm$ 0.0               | 0.0 $\pm$ 0.0               | 0.1 $\pm$ 0.0               |
| <i>Turicibacter</i>           | 0.0 $\pm$ 0.0                            | <b>0.1</b> $\pm$ <b>0.2</b>  | <b>0.8</b> $\pm$ <b>1.1</b> | 0.0 $\pm$ 0.0                 | 0.3 $\pm$ 0.4   | 0.4 $\pm$ 0.7               | 0.4 $\pm$ 0.5               | <b>0.0</b> $\pm$ <b>0.1</b> |
| <i>Coprobacillaceae IS</i>    | 0.0 $\pm$ 0.0                            | <b>0.0</b> $\pm$ <b>0.0</b>  | 0.0 $\pm$ 0.0               | 0.0 $\pm$ 0.0                 | 0.0 $\pm$ 0.0   | 0.0 $\pm$ 0.0               | 0.0 $\pm$ 0.0               | <b>0.0</b> $\pm$ <b>0.0</b> |
| <i>Adlercreutzia</i>          | 0.2 $\pm$ 0.1                            | 0.3 $\pm$ 0.2                | 0.2 $\pm$ 0.1               | 0.2 $\pm$ 0.2                 | 0.0 $\pm$ 0.0   | <b>0.1</b> $\pm$ <b>0.0</b> | 0.0 $\pm$ 0.0               | <b>0.1</b> $\pm$ <b>0.1</b> |
| <i>Coriobacteriales IS</i>    | BQL                                      | BQL                          | BQL                         | BQL                           | BQL             | BQL                         | BQL                         | <b>0.2</b> $\pm$ <b>0.2</b> |

<sup>a</sup>Only genera that were present at  $\geq 1\%$  in a sample are included in this table, the complete data set is presented in Table SX.

<sup>b</sup>The detection limit was 0.00003 and this value was used to calculate the p-value.

<sup>c</sup>Genera that differ from 0.5 h time point within each group are shown in bold ( $p \leq 0.05$ ).

IS: Incertae Sedis.

BQL: Below quantifiable limit.
