# Supplementary material for: The Effect of Lactobacillus casei 32G on the Mouse Cecum Microbiota and Innate Immune Response Is Dose and Time Dependent
Source: PLOS journal article supplement (doi:10.1371/journal.pone.0145784), 2015-12-29
Supplement: S8 (10.1371/journal.pone.0145784.s008) [file journal.pone.0145784.s008]

**S3 Table.** pH of mouse cecum content after sacrificing.

|         | <b>pH (mean ± SE)*</b> |             |            |                  |
|---------|------------------------|-------------|------------|------------------|
|         | <b>0.5h</b>            | <b>3.5h</b> | <b>12h</b> | <b>24h</b>       |
| Control | 7.2 ± 0.2              | 7.6 ± 0.2   | 7.1 ± 0.0  | 7.3 ± 0.1        |
| Low     | 7.3 ± 0.2              | 7.8 ± 0.1   | 7.1 ± 0.1  | 7.5 ± 0.2        |
| Medium  | <b>7.6 ± 0.1</b>       | 7.7 ± 0.1   | 7.1 ± 0.1  | <b>7.6 ± 0.1</b> |
| High    | <b>7.5 ± 0.2</b>       | 7.6 ± 0.1   | 7.1 ± 0.1  | 7.4 ± 0.1        |

\*pH that differs from control within each group is shown in bold (p≤0.05).
